# Supplementary material
Source: PubMed Central journal article supplement (PMC4787734)
Supplement: golm748442.ww1_default.pdf [file golm748442.ww1_default.pdf]

## Appendix to Table 1

| Medical Destinations   | 1993 & 1996 cohorts |             |             |             |             |             | 1974, 1977, 1983 cohorts |             |             |             |             |             |
|------------------------|---------------------|-------------|-------------|-------------|-------------|-------------|--------------------------|-------------|-------------|-------------|-------------|-------------|
|                        | Year 1              |             | Year 3      |             | Year 5      |             | Year 1                   |             | Year 3      |             | Year 5*     |             |
|                        | n                   | N           | n           | N           | n           | N           | n                        | N           | n           | N           | n           | N           |
| <b>All respondents</b> |                     |             |             |             |             |             |                          |             |             |             |             |             |
| Hospital medical       | 345                 | 754         | 387         | 574         | 450         | 521         | 369                      | 944         | 405         | 666         | 326         | 407         |
| Paediatrics            | 123                 | 227         | 148         | 236         | 140         | 183         | 94                       | 266         | 122         | 206         | 94          | 126         |
| A&E                    | 21                  | 79          | 58          | 110         | 77          | 101         | 2                        | 19          | 10          | 32          | 13          | 23          |
| Surgery                | 389                 | 626         | 388         | 481         | 403         | 440         | 484                      | 842         | 497         | 637         | 356         | 409         |
| O&G                    | 76                  | 147         | 86          | 121         | 81          | 95          | 82                       | 181         | 117         | 165         | 71          | 92          |
| Anaesthetics           | 139                 | 229         | 223         | 275         | 260         | 279         | 167                      | 245         | 293         | 363         | 205         | 239         |
| Radiology              | 17                  | 53          | 45          | 59          | 96          | 103         | 38                       | 85          | 101         | 119         | 94          | 105         |
| Clinical Oncology      | 8                   | 31          | 39          | 59          | 72          | 85          | 15                       | 46          | 29          | 42          | 33          | 39          |
| Pathology              | 28                  | 49          | 66          | 93          | 83          | 89          | 139                      | 229         | 208         | 253         | 136         | 148         |
| Psychiatry             | 104                 | 139         | 160         | 173         | 172         | 178         | 143                      | 202         | 217         | 254         | 153         | 172         |
| GP                     | 634                 | 772         | 885         | 966         | 1068        | 1112        | 1745                     | 2209        | 2169        | 2525        | 1431        | 1565        |
| Public Health          | 3                   | 7           | 2           | 5           | 5           | 8           | 9                        | 53          | 29          | 63          | 36          | 67          |
| Other medical          | 3                   | 48          | 7           | 53          | 9           | 59          | 23                       | 99          | 36          | 88          | 28          | 63          |
| <b>Total</b>           | <b>1890</b>         | <b>3161</b> | <b>2494</b> | <b>3205</b> | <b>2916</b> | <b>3253</b> | <b>3310</b>              | <b>5420</b> | <b>4233</b> | <b>5413</b> | <b>2976</b> | <b>3455</b> |
| <b>Men only</b>        |                     |             |             |             |             |             |                          |             |             |             |             |             |
| Hospital medical       | 197                 | 378         | 223         | 315         | 249         | 277         | 312                      | 710         | 332         | 525         | 275         | 336         |
| Paediatrics            | 41                  | 74          | 46          | 72          | 45          | 61          | 53                       | 139         | 75          | 115         | 58          | 73          |
| A&E                    | 14                  | 38          | 32          | 55          | 44          | 55          | 2                        | 12          | 7           | 20          | 12          | 19          |
| Surgery                | 309                 | 468         | 306         | 367         | 315         | 341         | 454                      | 757         | 454         | 575         | 332         | 375         |
| O&G                    | 26                  | 39          | 29          | 38          | 23          | 29          | 53                       | 107         | 75          | 99          | 46          | 57          |
| Anaesthetics           | 74                  | 113         | 130         | 156         | 151         | 159         | 113                      | 158         | 207         | 253         | 150         | 170         |
| Radiology              | 12                  | 28          | 28          | 36          | 56          | 62          | 25                       | 49          | 64          | 70          | 66          | 71          |
| Clinical Oncology      | 2                   | 11          | 13          | 22          | 23          | 29          | 10                       | 27          | 19          | 28          | 20          | 24          |
| Pathology              | 15                  | 24          | 28          | 39          | 34          | 36          | 93                       | 143         | 138         | 163         | 87          | 94          |
| Psychiatry             | 54                  | 73          | 83          | 89          | 85          | 87          | 93                       | 122         | 134         | 151         | 94          | 98          |
| GP                     | 201                 | 249         | 294         | 319         | 383         | 394         | 1092                     | 1312        | 1373        | 1527        | 999         | 1054        |
| Public Health          |                     | 2           |             |             |             | 2           | 5                        | 19          | 11          | 18          | 14          | 22          |
| Other medical          |                     | 19          | 3           | 22          | 5           | 23          | 19                       | 76          | 26          | 58          | 21          | 43          |
| <b>Total</b>           | <b>945</b>          | <b>1516</b> | <b>1215</b> | <b>1530</b> | <b>1413</b> | <b>1555</b> | <b>2324</b>              | <b>3631</b> | <b>2915</b> | <b>3602</b> | <b>2174</b> | <b>2436</b> |
| <b>Women only</b>      |                     |             |             |             |             |             |                          |             |             |             |             |             |
| Hospital medical       | 148                 | 376         | 164         | 259         | 201         | 244         | 57                       | 234         | 73          | 141         | 51          | 71          |
| Paediatrics            | 82                  | 153         | 102         | 164         | 95          | 122         | 41                       | 127         | 47          | 91          | 36          | 53          |
| A&E                    | 7                   | 41          | 26          | 55          | 33          | 46          |                          | 7           | 3           | 12          | 1           | 4           |
| Surgery                | 80                  | 158         | 82          | 114         | 88          | 99          | 30                       | 85          | 43          | 62          | 24          | 34          |
| O&G                    | 50                  | 108         | 57          | 83          | 58          | 66          | 29                       | 74          | 42          | 66          | 25          | 35          |
| Anaesthetics           | 65                  | 116         | 93          | 119         | 109         | 120         | 54                       | 87          | 86          | 110         | 55          | 69          |
| Radiology              | 5                   | 25          | 17          | 23          | 40          | 41          | 13                       | 36          | 37          | 49          | 28          | 34          |
| Clinical Oncology      | 6                   | 20          | 26          | 37          | 49          | 56          | 5                        | 19          | 10          | 14          | 13          | 15          |
| Pathology              | 13                  | 25          | 38          | 54          | 49          | 53          | 46                       | 86          | 70          | 90          | 49          | 54          |
| Psychiatry             | 50                  | 66          | 77          | 84          | 87          | 91          | 50                       | 80          | 83          | 103         | 59          | 74          |
| GP                     | 433                 | 523         | 591         | 647         | 685         | 718         | 653                      | 897         | 796         | 998         | 432         | 511         |
| Public Health          | 3                   | 5           | 2           | 5           | 5           | 6           | 4                        | 34          | 18          | 45          | 22          | 45          |
| Other medical          | 3                   | 29          | 4           | 31          | 4           | 36          | 4                        | 23          | 10          | 30          | 7           | 20          |
| <b>Total</b>           | <b>945</b>          | <b>1645</b> | <b>1279</b> | <b>1675</b> | <b>1503</b> | <b>1698</b> | <b>986</b>               | <b>1789</b> | <b>1318</b> | <b>1811</b> | <b>802</b>  | <b>1019</b> |

\*Year 5 data exclude 1983 cohort

## Appendix to Table 2

| Medical Destinations   | 1993 & 1996 cohorts |             |             |             |             |             | 1974, 1977, 1983 cohorts |             |             |             |             |             |
|------------------------|---------------------|-------------|-------------|-------------|-------------|-------------|--------------------------|-------------|-------------|-------------|-------------|-------------|
|                        | Year 1              |             | Year 3      |             | Year 5      |             | Year 1                   |             | Year 3      |             | Year 5*     |             |
|                        | n                   | N           | n           | N           | n           | N           | n                        | N           | n           | N           | n           | N           |
| <b>All respondents</b> |                     |             |             |             |             |             |                          |             |             |             |             |             |
| Hospital medical       | 345                 | 543         | 387         | 548         | 450         | 536         | 369                      | 632         | 405         | 575         | 326         | 390         |
| Paediatrics            | 123                 | 166         | 148         | 174         | 140         | 167         | 94                       | 241         | 122         | 228         | 94          | 149         |
| A&E                    | 21                  | 117         | 58          | 108         | 77          | 104         | 2                        | 52          | 10          | 44          | 13          | 26          |
| Surgery                | 389                 | 430         | 388         | 432         | 403         | 426         | 484                      | 593         | 497         | 533         | 356         | 367         |
| O&G                    | 76                  | 97          | 86          | 101         | 81          | 94          | 82                       | 157         | 117         | 145         | 71          | 88          |
| Anaesthetics           | 139                 | 291         | 223         | 303         | 260         | 303         | 167                      | 419         | 293         | 387         | 205         | 233         |
| Radiology              | 17                  | 104         | 45          | 102         | 96          | 107         | 38                       | 172         | 101         | 159         | 94          | 113         |
| Clinical Oncology      | 8                   | 93          | 39          | 90          | 72          | 94          | 15                       | 74          | 29          | 67          | 33          | 46          |
| Pathology              | 28                  | 110         | 66          | 112         | 83          | 104         | 139                      | 318         | 208         | 289         | 136         | 179         |
| Psychiatry             | 104                 | 199         | 160         | 224         | 172         | 210         | 143                      | 333         | 217         | 324         | 153         | 192         |
| GP                     | 634                 | 1269        | 885         | 1292        | 1068        | 1283        | 1745                     | 2926        | 2169        | 2686        | 1431        | 1670        |
| Public Health          | 3                   | 40          | 2           | 44          | 5           | 48          | 9                        | 176         | 29          | 156         | 36          | 103         |
| Other medical          | 3                   | 49          | 7           | 49          | 9           | 48          | 23                       | 171         | 36          | 159         | 28          | 90          |
| <b>Total</b>           | <b>1890</b>         | <b>3508</b> | <b>2494</b> | <b>3579</b> | <b>2916</b> | <b>3524</b> | <b>3310</b>              | <b>6264</b> | <b>4233</b> | <b>5752</b> | <b>2976</b> | <b>3646</b> |
| <b>Men only</b>        |                     |             |             |             |             |             |                          |             |             |             |             |             |
| Hospital medical       | 197                 | 294         | 223         | 300         | 249         | 285         | 312                      | 497         | 332         | 452         | 275         | 313         |
| Paediatrics            | 41                  | 59          | 46          | 58          | 45          | 55          | 53                       | 111         | 75          | 106         | 58          | 69          |
| A&E                    | 14                  | 65          | 32          | 58          | 44          | 56          | 2                        | 36          | 7           | 31          | 12          | 21          |
| Surgery                | 309                 | 333         | 306         | 343         | 315         | 332         | 454                      | 540         | 454         | 481         | 332         | 341         |
| O&G                    | 26                  | 31          | 29          | 34          | 23          | 29          | 53                       | 100         | 75          | 91          | 46          | 55          |
| Anaesthetics           | 74                  | 154         | 130         | 172         | 151         | 172         | 113                      | 300         | 207         | 272         | 150         | 174         |
| Radiology              | 12                  | 58          | 28          | 55          | 56          | 60          | 25                       | 113         | 64          | 104         | 66          | 77          |
| Clinical Oncology      | 2                   | 35          | 13          | 33          | 23          | 32          | 10                       | 49          | 19          | 42          | 20          | 30          |
| Pathology              | 15                  | 45          | 28          | 46          | 34          | 41          | 93                       | 206         | 138         | 189         | 87          | 109         |
| Psychiatry             | 54                  | 98          | 83          | 111         | 85          | 103         | 93                       | 181         | 134         | 181         | 94          | 107         |
| GP                     | 201                 | 454         | 294         | 472         | 383         | 463         | 1092                     | 1858        | 1373        | 1701        | 999         | 1148        |
| Public Health          | 0                   | 11          |             | 13          |             | 15          | 5                        | 45          | 11          | 41          | 14          | 25          |
| Other medical          | 0                   | 29          | 3           | 29          | 5           | 28          | 19                       | 110         | 26          | 104         | 21          | 62          |
| <b>Total</b>           | <b>945</b>          | <b>1666</b> | <b>1215</b> | <b>1724</b> | <b>1413</b> | <b>1671</b> | <b>2324</b>              | <b>4146</b> | <b>2915</b> | <b>3795</b> | <b>2174</b> | <b>2531</b> |
| <b>Women only</b>      |                     |             |             |             |             |             |                          |             |             |             |             |             |
| Hospital medical       | 148                 | 249         | 164         | 248         | 201         | 251         | 57                       | 135         | 73          | 123         | 51          | 77          |
| Paediatrics            | 82                  | 107         | 102         | 116         | 95          | 112         | 41                       | 130         | 47          | 122         | 36          | 80          |
| A&E                    | 7                   | 52          | 26          | 50          | 33          | 48          |                          | 16          | 3           | 13          | 1           | 5           |
| Surgery                | 80                  | 97          | 82          | 89          | 88          | 94          | 30                       | 53          | 43          | 52          | 24          | 26          |
| O&G                    | 50                  | 66          | 57          | 67          | 58          | 65          | 29                       | 57          | 42          | 54          | 25          | 33          |
| Anaesthetics           | 65                  | 137         | 93          | 131         | 109         | 131         | 54                       | 119         | 86          | 115         | 55          | 59          |
| Radiology              | 5                   | 46          | 17          | 47          | 40          | 47          | 13                       | 59          | 37          | 55          | 28          | 36          |
| Clinical Oncology      | 6                   | 58          | 26          | 57          | 49          | 62          | 5                        | 25          | 10          | 25          | 13          | 16          |
| Pathology              | 13                  | 65          | 38          | 66          | 49          | 63          | 46                       | 112         | 70          | 100         | 49          | 70          |
| Psychiatry             | 50                  | 101         | 77          | 113         | 87          | 107         | 50                       | 152         | 83          | 143         | 59          | 85          |
| GP                     | 433                 | 815         | 591         | 820         | 685         | 820         | 653                      | 1068        | 796         | 985         | 432         | 522         |
| Public Health          | 3                   | 29          | 2           | 31          | 5           | 33          | 4                        | 131         | 18          | 115         | 22          | 78          |
| Other medical          | 3                   | 20          | 4           | 20          | 4           | 20          | 4                        | 61          | 10          | 55          | 7           | 28          |
| <b>Total</b>           | <b>945</b>          | <b>1842</b> | <b>1279</b> | <b>1855</b> | <b>1503</b> | <b>1853</b> | <b>986</b>               | <b>2118</b> | <b>1318</b> | <b>1957</b> | <b>802</b>  | <b>1115</b> |

\*Year 5 data exclude 1983 cohort

### Appendix to Table 3

| Choice specified as: | 1993 & 1996 |           |           | 1974, 1977, 1983* |           |           |
|----------------------|-------------|-----------|-----------|-------------------|-----------|-----------|
|                      | Year 1      | Year 3    | Year 5    | Year 1            | Year 3    | Year 5    |
|                      | n/N         | n/N       | n/N       | n/N               | n/N       | n/N       |
| Definite             | 722/982     | 1324/1532 | 2082/2263 | 1369/1844         | 2536/2924 | 2108/2318 |
| Probable             | 935/1743    | 1016/1457 | 752/1015  | 1621/3106         | 1462/2144 | 717/995   |
| Uncertain            | 213/742     | 140/407   | 76/184    | 303/1277          | 215/632   | 85/243    |
| Total                | 1890/3508   | 2494/3579 | 2916/3524 | 3310/6264         | 4233/5752 | 2976/3646 |

\*Year 5 data excludes the 1983 cohort.

In the body of the table, 'N' denotes the numbers of respondents working in a known medical destination at year 10 and responding to the definiteness of choice question, and 'n' denotes the numbers of these who gave a matching untied first choice in years 1, 3, and 5.

The 'Total' line includes all responders with known choice and year 10 destination, including those who did not respond to the definiteness of choice question; hence totals are greater than the total of definite, probable and uncertain. Of those working in a medical destination at year 10, 78 gave no response to the definiteness of choice question at year 1, 235 at year 3 and 163 at year 5.
